# Histone modifications influence mediator interactions with chromatin

Xuefeng Zhu<sup>1</sup>, Yongqiang Zhang<sup>2</sup>, Gudrun Bjornsdottir<sup>2</sup>, Zhongle Liu<sup>2</sup>, Amy Quan<sup>2</sup>, Michael Costanzo<sup>3</sup>, Marcela Dávila López<sup>1</sup>, Jakub Orzechowski Westholm<sup>4</sup>, Hans Ronne<sup>4</sup>, Charles Boone<sup>3</sup>, Claes M. Gustafsson<sup>1</sup> and Lawrence C. Myers<sup>2,\*</sup>

<sup>1</sup>Department of Biochemistry and Cell Biology, University of Gothenburg, SE-405 30 Gothenburg, Sweden,

<sup>2</sup>Department of Biochemistry, Dartmouth Medical School, Hanover, New Hampshire 03755, USA,

<sup>3</sup>Banting and Best Department of Medical Research, Terrence Donnelly Center for Cellular and Biomolecular Research, University of Toronto, Toronto, ON, Canada, M5S 1A7 and <sup>4</sup>Department of Microbiology, Swedish University of Agricultural Sciences, Box 7025, SE-75007 Uppsala, Sweden

Received February 4, 2011; Revised June 10, 2011; Accepted June 16, 2011

## ABSTRACT

**The Mediator complex transmits activation signals from DNA bound transcription factors to the core transcription machinery. Genome wide localization studies have demonstrated that Mediator occupancy not only correlates with high levels of transcription, but that the complex also is present at transcriptionally silenced locations. We provide evidence that Mediator localization is guided by an interaction with histone tails, and that this interaction is regulated by their post-translational modifications. A quantitative, high-density genetic interaction map revealed links between Mediator components and factors affecting chromatin structure, especially histone deacetylases. Peptide binding assays demonstrated that pure wild-type Mediator forms stable complexes with the tails of Histone H3 and H4. These binding assays also showed Mediator–histone H4 peptide interactions are specifically inhibited by acetylation of the histone H4 lysine 16, a residue critical in transcriptional silencing. Finally, these findings were validated by tiling array analysis that revealed a broad correlation between Mediator and nucleosome occupancy *in vivo*, but a negative correlation between Mediator and nucleosomes acetylated at histone H4 lysine 16. Our studies show that chromatin structure and the acetylation state of histones are intimately connected to Mediator localization.**

## INTRODUCTION

Transcription in purified and extract based systems, *in vivo* studies, and cell-based assays have identified the eukaryotic Mediator complex as a target for a wide variety of activators. Analysis of purified Mediator has demonstrated that the core of the *Saccharomyces cerevisiae* complex is composed of 21 polypeptides (1–3). Biochemical (4) and structural studies (5) allowed the assignment of subunits to structurally distinct modules of the Mediator complex referred to as Tail, Middle and Head. In addition, a separate subset of proteins termed the Cdk8 module is variably associated with the core Mediator subunits (6,7). Definitive genomic and proteomic analyses revealed orthologs for nearly all yeast Mediator subunits in higher eukaryotes (8–10). Parallel biochemical and genetic experiments showed that certain subunits are critical for the activation of specific sets of genes (1,11). Transcriptional profiling *in vivo* demonstrated that other Mediator subunits are essential for transcription of virtually all genes in *S. cerevisiae* (12), suggesting the complex was also a general transcription factor (GTF). A number of genetic screens and experiments in *S. cerevisiae* have also established an important role for Mediator in transcriptional repression (13–19). The mechanism used by Mediator to facilitate repression is not understood, but could be related to its recently discovered localization at silenced or repressed chromatin.

Transcriptional activators recruit Mediator and govern the occupancy of the complex at the promoters of certain highly induced genes (20). There are, however, patterns of Mediator occupancy that do not appear to be regulated by

\*To whom correspondence should be addressed. Tel: +1 603 650 1198; Fax: +1 603 650 1128; Email: larry.myers@dartmouth.edu  
Present addresses:

Yongqiang Zhang, Department of Physiology, Johns Hopkins University School of Medicine, Baltimore, Maryland 21205, USA

Jakub Orzechowski Westholm, Department of Developmental Biology, Sloan-Kettering Institute, New York 10065, New York, USA

this mechanism. Genome wide array studies have mapped Mediator occupancy across entire chromosomes in *S. cerevisiae* (21) and *Schizosaccharomyces pombe* (22). These studies revealed a uniformly composed core complex upstream of active genes, but unexpectedly also upstream of inactive genes and on the coding regions of some genes. Mediator occupancy was also detected in transcriptionally silent regions of yeast chromosomes. Recent work has shown that Mediator both occupies specific locations on *S. cerevisiae* telomeres and is important for keeping them transcriptionally silent (23). In contrast to other components of the general transcription apparatus, such as RNA Pol II (21,22) and TBP (24) that have a strong positive correlation with transcription rates, these studies found no strong positive or negative correlation between Mediator occupancy and transcription. Mediator occupancy at repressed/silenced genes may explain why certain Mediator mutants lead to increased gene expression from specific promoters. How Mediator might be targeted to such silenced genes and regions of chromosomes, however, is not known.

There are several ways that Mediator could be targeted to repressed or silenced regions of chromosomes. There is some evidence for interactions between Mediator and the Co-repressor Tup1 (25,26). Although some Mediator repressed genes also require the Ssn6p/Tup1p co-repressor complex for repression, many are independent of this complex (16). In addition to an indirect recruitment by co-repressors, Mediator could also be recruited to silenced regions via direct interactions with chromatin. Local chromatin structure combined with histone modifications determines protein localization at specific loci (27). We have previously reported that purified Mediator and mono-nucleosomes directly interact with each other (28). Genetic studies have suggested a connection between Mediator facilitated repression and chromatin structure *in vivo*. Transcriptional repression and silencing involve the intricate manipulation of nucleosome positioning, stability, composition and post-translational modification (29–31). Mediator *med16(sin4)* and *med14(rgr1)* mutations, which lead to de-repression of a subset of genes, are accompanied by gross alterations in chromatin structure *in vivo* (13,32). A follow up study revealed that de-repression by the *med16(sin4)* mutant potentially occurs by an epigenetic mechanism (33), further suggesting a connection to chromatin structure. Our recent studies show that Mediator mutations lead to decreased Mediator occupancy at *S. cerevisiae* telomeres that are accompanied by alterations in heterochromatin structure that result in loss of transcriptional silencing (23). These largely genetic experiments hint at an important connection between Mediator and chromatin structure/modification.

In this study we have investigated the connection between chromatin and Mediator localization. Our studies demonstrate a correlation between Mediator and nucleosome occupancy *in vivo* and begin to elucidate the molecular determinants of this interaction. By providing biochemical and genomic experiments that suggest a molecular basis for Mediator–chromatin interactions in

yeast, our studies begin to fill a critical gap in the understanding of Mediator function.

## MATERIALS AND METHODS

### Construction of yeast strains used in study

Temperature sensitive mutant strains of *MED4*, *MED7* and *MED8* were generated by the gap repair method (34) using PCR mutagenesis conditions as described (35). After screening for temperature sensitivity, the plasmids bearing the mutant Mediator subunits were isolated and sequenced. To integrate the temperature sensitive mutants for *MED4*, *MED7* and *MED8* into the chromosome, the ORFs were amplified, cloned into yIPlac211 and cleaved with Hpa I, Cla I and Kpn I respectively, and transformed into yYQ101, a haploid strain derived from BY4743 (36) (Table 1). Ura<sup>+</sup> transformants were selected; the colonies then grown on YPD and then plated on 5-FOA to select for the excision of the *URA3* marker. The temperature sensitivity of these strains was confirmed to be identical to the plasmid borne genes, and the ORF sequenced. For protein purification of Mediator from strains containing the temperature sensitive mutants, the coding sequence of the C-terminus of the Med18(Srb5)-Flag tagged gene and the KanMX marker were amplified from the wild-type Med18(Srb5)-Flag strain SHY349 (37). This product was used to transform the mutant strains that had integrated ts alleles. For SGA analyses the coding sequences for the *med7-163* and *med8-39* ts mutant alleles were amplified and integrated into the strain Y7092 as described (38). The temperature sensitivity of these strains was checked and was identical to the plasmid borne genes. The Flag tagged, mutant histone H4 strain for ChIP-chip analyses was constructed by first amplifying the coding sequence of the C-terminus of the Med18(Srb5)-Flag tagged gene and the KanMX marker from the wild-type Med18(Srb5)-Flag strain SHY349 (37) and transforming the strain WZY42 (39). Using the plasmid pWZ414-F47, the mutant histone H4 (K8Q, K16Q) was then swapped for the wild-type H4 in the Med18(Srb5)-Flag tagged WZY42 strain as previously described (39).

**Table 1.** Yeast strains used

| Name         | Genotype                                                                        |
|--------------|---------------------------------------------------------------------------------|
| yYQ101       | <i>his3Δ1; leu2Δ0; lys2Δ0; met15Δ0; ura3Δ0; MAT-alpha</i>                       |
| yYQ25.6/12   | yYQ101; <i>med4-6</i>                                                           |
| yYQ26.163/32 | yYQ101; <i>med7-163</i>                                                         |
| yYQ27.39/11  | yYQ101; <i>med8-39</i>                                                          |
| yYQ43.3      | yYQ101; <i>med4-6; SRB5::SRB5-3FLAG-KanMX</i>                                   |
| yYQ47.2      | yYQ101; <i>med7-163; SRB5::SRB5-3FLAG-KanMX</i>                                 |
| Y7092        | <i>MATalpha, can1Δ::STE2pr-Sp_his5 lyp1Δ his3Δ1 leu2Δ0 ura3Δ0 met15Δ0 LYS2+</i> |
| yYQ64.163/18 | Y7092; <i>med7-163-NatR</i>                                                     |
| yYQ65.39/6   | Y7092; <i>med8-39-NatR</i>                                                      |

## Protein purification

Untagged wild-type Mediator was purified as previously described (40). Flag-tagged wild-type Mediator was purified from cells grown to mid-log phase and lysates made as previously described (41). Cells for purification of Mediator from the *med4 ts* strain (yYQ43.3) were grown to  $OD_{600} = 2$  at 25°C and harvested. Cells for purification of Mediator from the *med7 ts* strain (yYQ47.2) were grown to  $OD_{600} = 2$  at 25°C, rapidly shifted to 34°C by swirling the flask in hot water, and allowed to continue shaking at 34°C for 45 min. These cells were harvested and the lysates prepared as previously described (41). The purification of the Flag-tagged wild-type and mutant mediators for assessing the composition and stability of the mutant complexes was performed as previously described (42).

## Histone tail peptide binding experiments

Histone tail peptide binding reactions (110  $\mu$ l) were performed in F-300 buffer [25 mM HEPES KOH (pH 7.6), 10% glycerol, 0.01% NP-40, 300 mM KOAc, 1 mM DTT] containing 0.1 mg/ml BSA combined with varying concentrations of biotinylated histone tail peptides (Millipore, US Biologicals) and purified untagged Mediator as specified in the figures. The above components were incubated at 4°C with rotation for 4 h. Twenty microliters of streptavidin coated magnetic beads (Invitrogen) were equilibrated with F-300 + 0.1 mg/ml BSA. After the histone tail peptide/Mediator incubation was complete, 10  $\mu$ l was removed as the 'input' and the rest added to the equilibrated streptavidin beads. This mixture was incubated at 4°C with rotation for 1 h. The supernatant was removed and the beads washed three times with F-300 buffer. Bound peptide and Mediator was eluted by boiling the beads for 2 min in 2 $\times$  SDS-PAGE loading dye. Mediator was monitored by SDS-PAGE and western blotting using antibodies against several Mediator subunits. Recovery of the peptide was assessed by SDS-PAGE, blotting and using an Streptavidin-HRP conjugate to detect the biotinylated peptide.

## SGA experiments

Synthetic genetic array experiments were performed by crossing the *med7* and *med8* temperature sensitive strains (yYQ64.163/18 and yYQ65.39/6) against a collection of 4000 yeast strains with individual deletions in 'non-essential' genes as described elsewhere (43). The initial analysis (repeated three times) identified deletion mutants that displayed synthetic fitness defects when combined with the Mediator temperature sensitive mutations at 30°C (38). Candidates, identified in the above screen and in SGA screens of other Mediator subunit mutants (44), were manually confirmed using random spore analysis (38). The experimental conditions used in this study differ from those described in a recent large-scale survey (45). We suspect that different screening temperatures (30°C versus 26°C) account for difference in genetic interactions identified for overlapping screens.

## ChIP-chip analyses

Mono-nucleosome extraction, tiling array hybridization, and data analysis were performed as described previously (46). All labeling and hybridization were carried out in Bioinformatics and Expression Analysis Core Facility at Karolinska Institute. Two independent biological replicates were carried out for each tiling array experiment. The Affymetrix tiling array software was used to calculate signal intensities. Data were deposited to NCBI GEO database (**GSE13615**, **GSE28613**). Moving average analysis and K-mean clustering was performed in the R programming environment.

## RESULTS

### Generation of temperature sensitive Mediator mutant strains and purification of mutant Mediators

Many members of the Head and Tail module of *S. cerevisiae* Mediator have specific importance for the function of DNA-bound transcriptional activators (11). In contrast, the Middle module appears to be functionally distinct from the Head and Tail (11). Many of these Middle module subunits are encoded by essential genes and have been functionally linked to transcriptional repression. In addition, no Middle module subunits have been identified as having direct interactions with activators. Therefore, we speculated that these subunits play a role in the non-activator dependent localization of the complex. To investigate this possibility, we constructed temperature sensitive mutants of essential Middle module subunits, Med4 and Med7. As a control, we also constructed temperature sensitive mutants of Med8, an essential Head module subunit that does not have a significant impact on Mediator facilitated repression. Using error-prone PCR and gap-repair mutagenesis we identified over 50 temperature sensitive alleles in each subunit that were viable at 30°C and dead at 37°C. Among these mutants, we identified several appropriate for both genetic and biochemical studies. First, we identified 'tight' alleles that displayed close to wild-type growth rates at 30°C, but were unable to grow at 34°C so as to avoid heat shock when shifting to the restrictive temperature. Second, we identified alleles that exhibited a rapid cessation of growth in liquid media upon shifting to the restrictive temperature. These alleles are useful for biochemical studies because the cells spend a minimal amount of time at the restrictive temperature to specifically inactivate the mutant protein. We used western blotting to identify alleles, for biochemical studies, for which the mutant protein was degraded or substoichiometric at the restrictive temperature. Absence of the mutant protein prevents its 're-activation' during purification. The open reading frames of several alleles that met many or all of these criteria were integrated at their native chromosomal loci. Retesting the alleles confirmed their temperature sensitivity (Figure 1) as well as their growth properties in liquid media (data not shown).



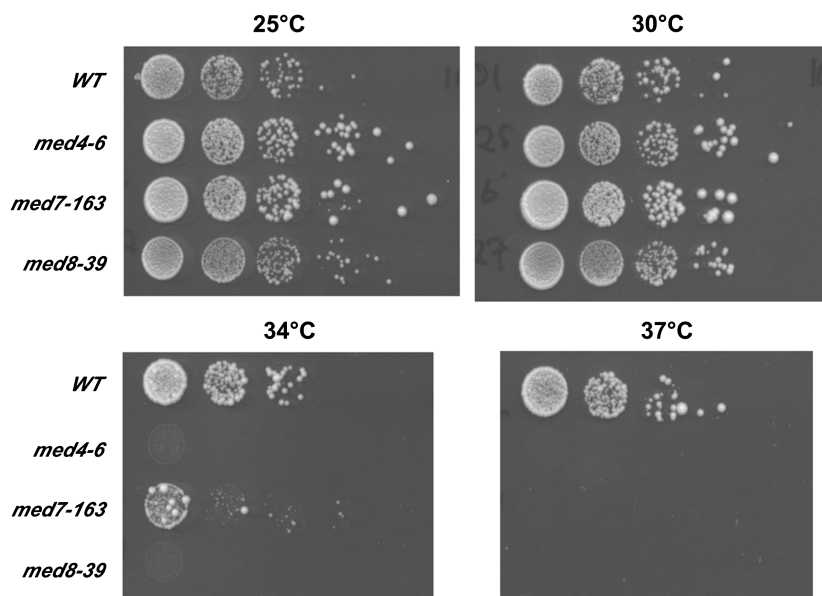

**Figure 1.** Characterization of temperature sensitive mutations in three subunits of Mediator encoded by essential genes. A serial dilution of yeast strains with chromosomal integrated *med4-6* (yYQ25.6/12), *med7-163* (yYQ26.163/32), and *med8-39* (yYQ27.39/11) temperature sensitive mutants spotted on YPD plates and incubated at 25, 30, 34 or 37°C. On each panel the top row shows a dilution series of the wild-type control strain followed by identical dilution series of each mutant strain.

To determine whether the mutations made perturbations to the composition of Mediator that were specific to the subunit targeted, we purified Mediator from the *med4* and *med7* temperature sensitive strains. Earlier biochemical work (47) made it clear that the effects of the Med8 mutation were likely to be localized to a module consisting of Med8, Med18 and Med20. To purify Mediator complex from the *med4* and *med7* temperature sensitive strains, the chromosomal copy of Med18(Srb5) was tagged with a C-terminal 3X FLAG tag. To prepare Mediator from the *med7 ts/Srb5-FLAG* strain, cells were grown at 23°C to mid-log phase, rapidly shifted to 34°C, grown for another 45 min, and harvested. Mediator from the *med4 ts/Med18(Srb5)-FLAG* strain was prepared from cells grown at 25°C. Both the *med7 ts* Mediator (Figure 2A) and the *med4 ts* Mediator (Figure 2B) were largely intact, but depleted for the mutant subunit. In the *med7 ts* Mediator, there appears to be a slight depletion of Med4 at 34°C, but the rest of the complex is intact. In addition to the severe depletion of the Med4 subunit, the purified *med4 ts* Mediator also appears to be substoichiometric for the Med9(Cse2) subunit. This is consistent with previous work that posits a direct interaction between Med4 and Med9(Cse2) in the intact complex (3). The antibodies used in Figure 2 represent all three modules in the core Mediator complex that we purify, and are an excellent metric of the stability of a largely intact complex. It is formally possible, albeit unlikely, that other subunits are substoichiometric.

#### Synthetic genetic array analysis identifies a unique connection between middle module Mediator subunits and histone deacetylation

The *med7 ts* strain and the *med8 ts* strain were screened in triplicate against an ordered array of ~4700 viable

gene-deletion strains and the relative growth of the double mutants was scored at 30°C as described previously (43). Random spore analysis was then used to validate candidate genetic interactions identified in our SGA screen. We also used random spore analysis to test selected candidates revealed by an E-MAP analysis of deletion mutants of other Mediator subunits encoded by non-essential genes (44). Two strains with different *med4* alleles were both found to be unsuitable for SGA analysis due to a low overall fitness in all double deletion strains. We sought to identify genes that would elucidate a potential role of Middle module subunits in Mediator localization and transcriptional repression. Thus, we were particularly interested in deletion mutants that had synthetic interactions with the *med7 ts* mutant (Middle module), but not the *med8 ts* mutant (Head module). All gene deletions that showed interactions with our mutants (Figures 3 and 4) and all gene deletions lacking an interaction (Tables 2 and 3) were confirmed by random spore analysis. First, we compiled a large set of synthetic interactions with the *med7 ts* mutant (Figure 3 and Table 2). We also validated a subset of synthetic interactions with the *med8 ts* (Figure 4). To determine whether potential interactions were specific to the *med7 ts*, we tested whether mutants that had synthetic interactions with the *med7 ts* also had synthetic interactions with the *med8 ts* (Figure 4 and Table 3). There are certainly additional synthetic interactions for the *med8 ts* mutant, but these were not validated with random spore analysis. Many of the basic synthetic interactions observed with the *med7 ts* mutant (Figure 3) could also be seen with other Mediator deletion mutants, in all sub-modules. Among these are strong synthetic interactions with other subunits of the core Mediator complex, as well as the Swr-Complex and Htz1 (44). These strong genetic

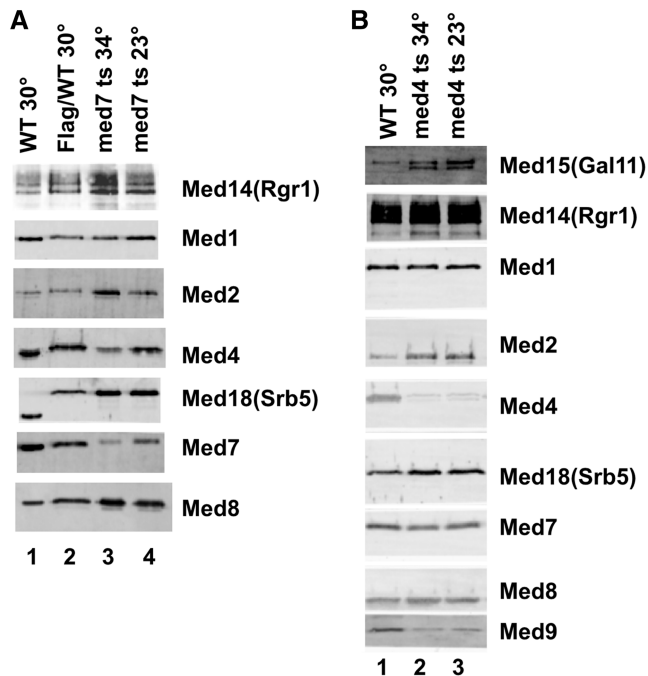

**Figure 2.** Composition of purified *med7 ts* and *med8 ts* mediators. (A) Western blot showing the stability of a mutant Mediator complex after the thermo-inactivation of the *med7*-163 mutant protein. Lane 1 shows wild-type Mediator purified by conventional means. Lanes 2–4 show the isolation of Mediator using a one step affinity purification under mild conditions, from whole cell extracts of a wild-type strain grown at 30°C, the *med7*-163 strain shifted to 34°C (for 45 min) or grown at 23°C. The strains used in Lanes 2–4 all had a Flag-tag on the chromosomal copy of Med18p(Srb5p). Mediator was depleted from extracts using  $\alpha$ -Flag agarose, and the form shown on the blot was eluted from the resin with Flag peptide. Amounts loaded are normalized so as to give an equal signal using an antibody against the native Med18p(Srb5p). (B) Western blot showing the stability of a mutant Mediator complex after the thermo-inactivation of the *med4*-6 mutant protein. Lane 1 shows wild-type Mediator purified from a Med18p(Srb5p) flag-tagged wild-type strain grown at 30°C. Lanes 2 and 3 show Mediator purified from whole cell extracts the Med18p(Srb5p) flag-tagged *med4*-6 strain grown at 23°C or shifted to 34°C (for 45 min) using a one step affinity purification under mild conditions. Mediator was depleted from extracts using  $\alpha$ -Flag agarose, and the form shown on the blot was eluted from the resin with Flag peptide. Amounts loaded are normalized so as to give an equal signal using an antibody against the native Med18p(Srb5p).

interactions are also observed for the *med8 ts* mutant. Akin to other Mediator subunits in the Middle module [Med1, Med9(Cse2) and Med31(Soh1)] and the Middle/tail interface [Med16(Sin4), Med5(Nut1)], the *med7 ts* mutant also shows synthetic interactions with components of chromatin remodeling complexes as well as complexes involved in transcriptional elongation and the modification of chromatin during elongation. Dst1 and the pathways leading to Histone H3 K4 and K36 methylation have synthetic phenotypes with the *med7 ts* mutant. With the exception of Dst1, the *med8 ts* mutant also interacts with these pathways (Figure 4). A distinguishing feature of *med7 ts* that was not seen in the *med8 ts* strain is strong genetic interactions with deletions of Hda1, Hda3 and Hst2 (Table 2), which are all components of complexes involved in histone deacetylation and transcriptional

repression (48,49). Although the published E-MAP data set is not complete for interactions with the *hda1* and *hst2* deletions, these studies did find a synthetic interaction between both *med16(sin4)* and *med5(nut1)* deletions, and the *hda1* deletion (44). Med16(Sin4) and Med5(Nut1) are on the interface of the Middle and Tail module. Both subunits are also strongly implicated in affecting chromatin structure and transcriptional silencing (13,23,32). These specific genetic interactions between the HDACs and Mediator subunits involved in repression led us to further investigate whether direct chromatin interactions, perhaps regulated by post-translational modification of histones, played a role in Mediator localization.

#### Acetylation of histone H4 K16 impedes the ability of mediator to bind histone H4 peptides

Earlier studies showing that purified Mediator complex can bind directly to purified mono-nucleosomes with high affinity in a electrophoretic mobility shift assay (28) suggested a functional connection between Mediator and chromatin. We implemented a Mediator-histone tail peptide binding assay to determine whether histone N-terminal tails and their post-translational modification might play a role in Mediator-chromatin interactions. Synthetic biotinylated peptides representing the N-terminal tails of histones H2A, H2AZ, H2B, H3 and H4 (sequences listed in Supplementary Table S1) were incubated with purified wild-type Mediator (42). The only peptides of this group to associate with Mediator, in a pull down assay, were the tails of Histone H3 and Histone H4 (Figure 5A). The H4 and H3 histone peptides were able to completely deplete Mediator from the input (data not shown). Although there may be substoichiometric impurities in the Mediator sample, it is unlikely that they could be responsible for Mediator's interaction with the histone peptides since they would not be expected to facilitate the complete depletion of Mediator. Titration of Mediator and peptide to lower concentrations showed that the affinity of Mediator for the H4 tail peptide was higher than that for H3 (data not shown). The SGA screen suggested a functional interaction between Middle module subunits and histone acetylation state. *In vivo*, lysines at Positions 5, 8, 12, 16 in the H4 tail, and at Positions 9 and 14 in the H3 tail are among those that have been observed to be frequently acetylated (50). To assess whether acetylation of any of these lysines affected Mediator's ability to interact with the Histone H4 or H3 tails we performed the Mediator pull down assay with Ac-(K5,8,12,16)-H4 and Ac-(K9,14)-H3 peptides. The Ac-(K9,14)-H3 peptide showed no difference in affinity from the unmodified H3-N peptide (Figure 5A), even at reduced concentrations of peptide and Mediator (data not shown). These data were also important in documenting that Mediator's affinity for the positively charged H3 histone tail was not solely based on the net charge of the peptide. In addition to acetylation of the H3 tail peptide neither mono- nor tri-methylation of lysine 4 had any measurable effect on Mediator binding (data not shown). In contrast to the H3 tail, the Ac-(K5,8,12,16)-H4 peptide had a clear

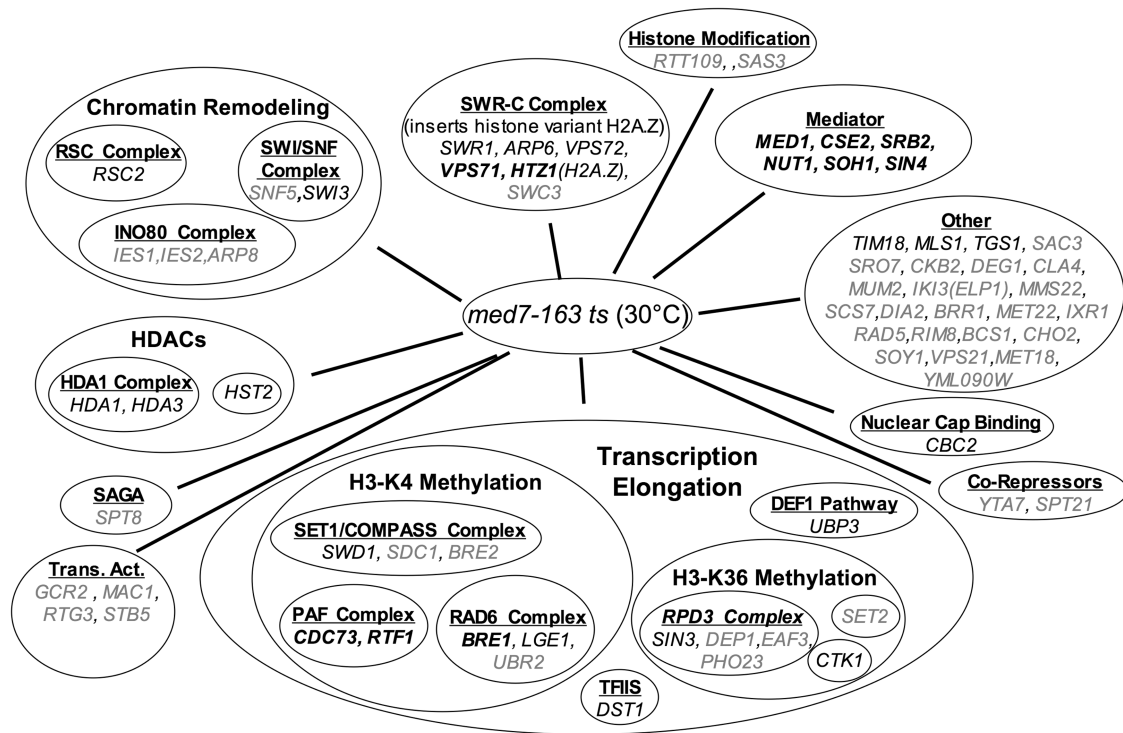

**Figure 3.** Genes whose deletion exhibited synthetic growth phenotypes with the *med7-163* mutant strain at 30°C. Genes highlighted in bold caused synthetic lethality. Genes in regular type caused a strong synthetic growth defect. Genes highlighted in grey caused a weaker, but clearly reproducible, synthetic growth defect. Genes implicated directly in transcription were manually grouped into functional classes. Only genes validated by random spore analysis are listed in the figure.

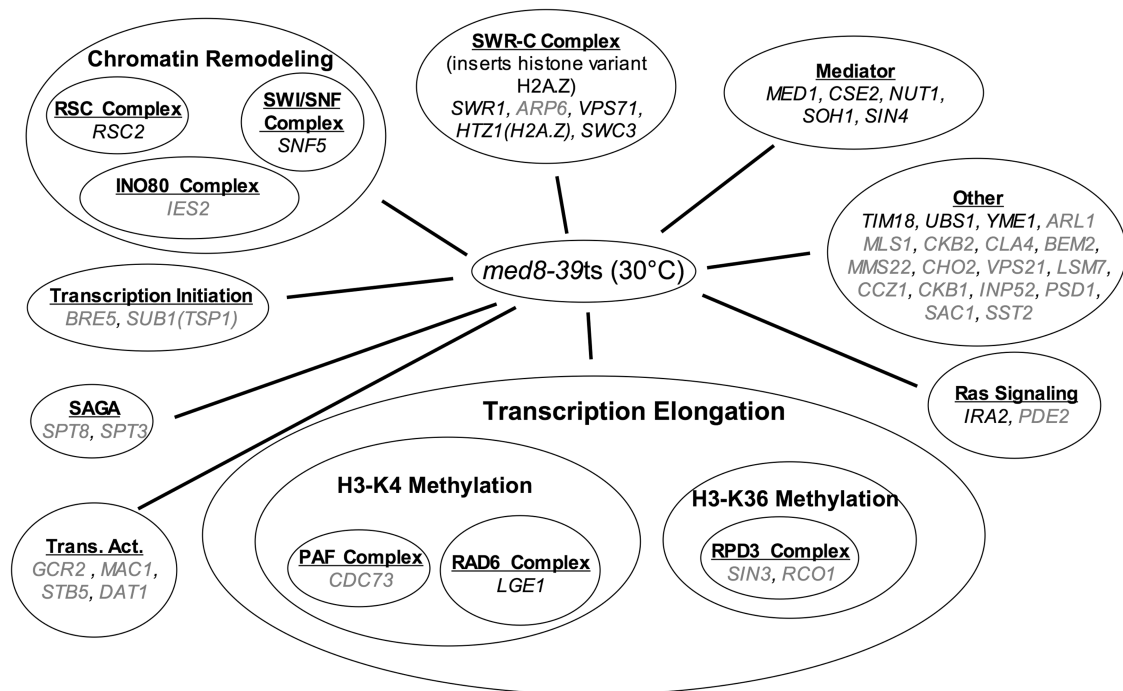

**Figure 4.** Genes whose deletion exhibited synthetic growth phenotypes with the *med8-39* mutant strains at 30°C. Genes in regular type caused a strong synthetic growth defect. Genes highlighted in grey caused a weaker, but clearly reproducible, synthetic growth defect. Genes implicated directly in transcription were manually grouped into functional classes. Only genes validated by random spore analysis are listed in the figure.



**Table 2.** Selected genes whose deletion do not show a synthetic growth phenotype with *med7 ts* at 30°C

| Category                | Gene                                                                                                                            |
|-------------------------|---------------------------------------------------------------------------------------------------------------------------------|
| Chromatin structure     | <i>HHT1, HHT2, DOT1, ASF1, HOS2, HOS4, SNT1, HST3, HST1, HOS1, RPD3, NHP10, SAP30, SDS3, RCO1, HAT2, SWD3, SET3, SIF2, SWC5</i> |
| Repression              | <i>MOT3, SFL1, HPC2, HIR1, HIR2, HIR3</i>                                                                                       |
| Gene-specific activator | <i>ELF1, HAP3, HAP4, RTG1, SWI4</i>                                                                                             |
| Signaling               | <i>PTK2, HOG1, MKS1, SNF1, SNF4, PDE2</i>                                                                                       |
| Chromosome segregation  | <i>MCM16, CTF4</i>                                                                                                              |
| Other transcription     | <i>RTT103, LSM6, LSM7, BRE5</i>                                                                                                 |

The lack of an interaction was validated by random spore analysis for all genes listed.

**Table 3.** Selected genes whose deletion do not show a synthetic growth phenotype with *med8 ts* at 30°C

| Category                | Gene                                                              |
|-------------------------|-------------------------------------------------------------------|
| Chromatin structure     | <i>SWD1, HDA1, HDA3, SNT1, HST2, HST1, SWI4, IES4, ISW2, ITC1</i> |
| Repression              | <i>MOT3, HIR1, HIR2, SKO1</i>                                     |
| Gene-specific activator | <i>RTG1</i>                                                       |
| Signaling               | <i>HOG1</i>                                                       |
| Chromosome segregation  | <i>MCM16, CTF4</i>                                                |
| Other transcription     | <i>DST1, RTT103, LSM6, MUD2, SRB8</i>                             |

The lack of an interaction was validated by random spore analysis for all genes listed.

Mediator binding defect compared to the unmodified H4 peptide. Mediator eluted from the Ac-(K5,8,12,16)-H4 peptide was equivalent to the no peptide added control (Figure 5A). To determine whether any of the acetylated H4 lysines had a specific affect on Mediator binding we systematically investigated individual lysines, separately and in various combinations. The Ac-(K8,16)-H4 peptide had lower affinity for Mediator compared to the Ac-(K5,12)-H4 peptide indicating that certain lysines have a greater effect on Mediator binding than others (Figure 5B). Although the affinity of the Ac-(K5,12)-H4 peptide for Mediator is greater than the Ac-(K8,16)-H4 peptide, the affinity of Ac-(K5,12)-H4 is decreased relative to the unmodified H4 peptide (data not shown). To elucidate the contribution of individual acetylated lysines, we tested the ability of Mediator to bind Ac-(K8)-H4, Ac-(K12)-H4, and Ac-(K16)-H4 peptides. Only Ac-(K16)-H4 lysine acetylation, which severely reduced Mediator binding, had a substantive effect on Mediator binding. Neither the Ac-(K8)-H4 or Ac-(K12)-H4 peptide had change in affinity for Mediator versus the unmodified peptide (Figure 5C). Similar to our findings for H3 binding, this result demonstrated that the H4 Mediator binding changes were based on something other than simply differences in net charge. A recovery control using blotting and a streptavidin-HRP conjugate showed that the amount of peptide was present in the input and elution

in comparable amounts for all peptides. A Ac-(K5)-H4 peptide was not included in these results since the recovery control showed that this synthetic peptide obtained from a commercial vendor was of the incorrect molecular weight (data not shown). Further attempts by us to synthesize the Ac-(K5)-H4 peptide were unsuccessful. Comparing the Ac-(K16)-H4 peptide with the Ac-(K8,16)-H4, and Ac-(K5,8,12,16)-H4 showed that although the acetylation of K16 had the strongest individual binding defect, acetylation of the other lysines in combination with K16 led to further decreases in affinity (data not shown). It is difficult to estimate actual  $K_d$  values from pull-down experiments, but by comparing elutions using varying concentrations of peptide and Mediator we assembled a series of relative affinities for tail peptides (Figure 5D).

### Mediator/nucleosome interactions *in vivo* are dependent on H4 K16 acetylation

The histone tail peptide binding data and earlier biochemical work (28) on nucleosome binding suggested Mediator could be targeted to certain regions of the genome via direct interactions with chromatin. To assess whether a correlation between Mediator and nucleosome localization exists *in vivo*, tiling arrays were used to map the occupancy of Mediator and nucleosomes across yeast chromosomes. To obtain a chromosome-wide profile of *S. cerevisiae* Mediator occupancy, we investigated DNA association *in vivo* with a strain carrying a TAP tag on the core Mediator component Med8. CHIP was performed on cells grown to mid logarithmic growth phase in rich medium. Input and immunoprecipitated samples were amplified and then hybridized to high-density oligonucleotide arrays (Affymetrix, Inc.) as previously described (22). To obtain a chromosome-wide profile of nucleosome occupancy, we purified mono nucleosomes from *S. cerevisiae* after Micrococcal nuclease digestion and obtained ~146-bp DNA fragments. As a control we used naked genomic DNA digested to fragments of similar size. Nucleosome-DNA associations *in vivo* were monitored using an antibody against histone H3. Input and immunoprecipitated samples were amplified and then hybridized to the same high-density oligonucleotide arrays used to analyze Mediator occupancy. A moving average analysis of all genome probes was performed of Mediator occupancy (*Y*-axis) versus nucleosome occupancy (*X*-axis) (Figure 6A). Mediator occupancy was calculated as  $\log_2$  of the ratio of Mediator to genomic DNA signals. The average genome-wide value for Mediator occupancy calculated in this way is  $-0.1905$ . When plotted against each other, Mediator occupancy and nucleosome occupancy exhibited a clear positive correlation peak as well as smaller negative one. The positive correlation peak indicates that nucleosomes and Mediator often occupy the same DNA sequences *in vivo*. This is what one would expect, if the direct Mediator-nucleosome interactions observed with purified proteins [(28), data herein] also occurred *in vivo*. The smaller peak of negative correlation indicated that there was a subset of Mediator in the cell associated with largely





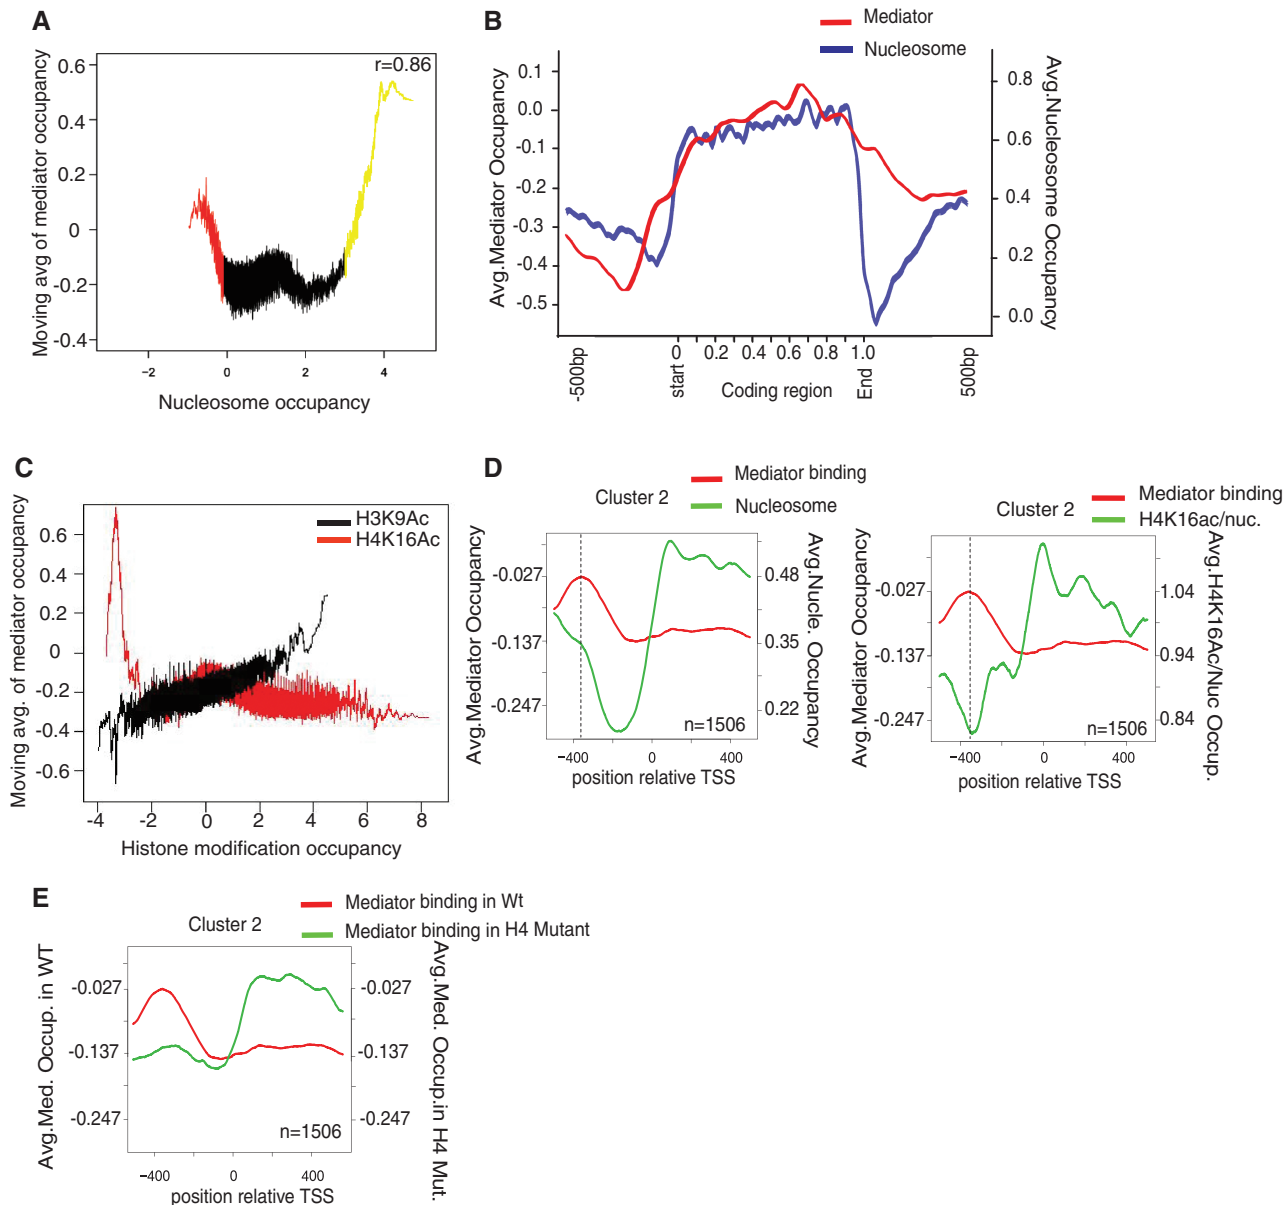

**Figure 6.** H4K16 acetylation influences Mediator occupancy *in vivo*. (A) Moving average analysis of Mediator versus nucleosome occupancy *in vivo*. Values on the X- and Y-axes are  $\log_2$  scale. Window size is 150. A correlation coefficient ( $r = 0.86$ ) is given for the yellow part of the graph (nucleosome occupancy  $>3$ ). (B) The average Mediator and nucleosome occupancy display similar patterns on highly transcribed genes. The positions relative to the coding regions are shown on the X-axis (with 500 bp of intergenic region on each side being included). Since the genes have different lengths, relative positions are used inside the coding regions. Values on the Y-axis are  $\log_2$  scale. (C) Moving average analysis of Mediator occupancy versus H4K16ac or H4K9ac occupancy *in vivo*. The X-axis ( $\log_2$ ) display H4K16ac or H3K9ac density, and the Y-axis ( $\log_2$ ) correspond to the moving average of Mediator occupancy with a window size of 150. (D) Mediator binding to *S. cerevisiae* genes were analyzed by *k*-means clustering ( $k = 5$ ), and a cluster with high levels of Mediator occupancy at the promoter (1506 genes) was chosen for further analysis. Average levels of Mediator, nucleosome, and H4K16 acetylation (normalized to nucleosome levels) are indicated on the Y-axis ( $\log_2$ ). Positions near the TSS ( $-500$  to  $+500$ ) are indicated on the X-axis. (E) The same analysis as in panel (D), but Mediator occupancy was analyzed both in a wild-type strain and in a histone H4 K8Q, K16Q mutant strain. In these experiments the wild-type and histone mutant Mediator ChIP were performed using a Med18(Srb5)-Flag tagged strain and the anti-Flag antibody (F1804, Sigma).

plot is a peak of Mediator occupancy at locations on the chromosome that have low levels of H4 AcK16 occupancy. Analysis of H3 K9 acetylation showed positive trends of Mediator occupancy follow the increased H3 K9 acetylation occupancy. These findings are consistent with our observation that acetylation of K16 on an H4 N-terminal peptide interferes with interactions between Mediator and histone H4 N-terminal tail peptide.

Previous studies have found that high levels of H4 K16 acetylation is primarily found at promoters and in the beginning of actively transcribed open reading frames. To further investigate the relationship between H4 K16 acetylation and Mediator occupancy, we first tried to identify a group of promoters on which Mediator was significantly enriched. We used a *k* mean cluster based approach and identified 1506 genes characterized by

high Mediator occupancy at the promoter (Figure 6D). The peak of Mediator occupancy on these genes was located about 360-bp upstream of the translation start site (TSS). Interestingly the peak of Mediator occupancy in the upstream region, correlated precisely with the minima of H4 K16 acetylation (Figure 6D, left panel). The overall nucleosome density for this region is shown in Figure 6D, right panel.

To further verify the idea that histone acetylation may influence Mediator occupancy at promoters, we used a yeast strain, in which amino acids K8 and K16 on histone H4 had been replaced by glutamine, which mimics the acetylated state. In our *in vitro* assays, these amino acid changes had displayed the strongest effects on Mediator binding to histone tail peptides. ChIP-on-chip experiments and analysis were performed as in Figure 6D. Interestingly, the peak of Mediator occupancy observed in the UAS region, was depleted in the K8Q, K16Q mutant strain (Figure 6E). Hence this result demonstrated that H4K16 acetylation can influence Mediator binding to UAS region of promoter. The effect of histone tail acetylation on Mediator occupancy may however be context dependent, since we these mutations also led to increased Mediator occupancy in the coding region.

## DISCUSSION

Two important observations about Mediator are not easily compatible with the current model of Mediator as a RNA Pol II co-activator: the occupancy of Mediator in promoters and open reading frames that are transcriptionally silent, and the multiple studies showing Mediator's functional role in transcriptional repression *in vivo*. These observations have raised the possibility that Mediator may regulate transcription through multiple mechanisms. Here, we suggest that interactions between Mediator and histone tails may allow the complex to impact transcription in a manner distinct from its well documented mechanism that invokes interactions with activators and the RNA Pol II transcription apparatus. The results of an SGA screen served as an important initial step in reaching this conclusion.

Although many Mediator subunits encoded by non-essential genes have been subjected to comprehensive study by synthetic genetic array screening, or 'E-MAP' analysis (44), considerably less is known about the genetic interactions of the subunits encoded by essential genes. In the previous 'E-MAP' analysis a 'decreased abundance by messenger RNA perturbation' (DAMP) approach was used to decrease the abundance of several mRNAs encoding essential Mediator subunits (44) to search for synthetic phenotype interactions with a deletion library. It is unclear whether this approach will be generally applicable to Mediator subunits as the synthetic interactions of *MED16(SIN4)-DAMP* allele showed very little overlap with a deletion mutant of this same non-essential subunit (44). Furthermore, the analysis of genetic interactions in the 'E-MAP' study (44) was restricted to a functionally biased subset of genes. A previous SGA analysis of an essential subunit of TFIID,

*TAF9*, had shown the utility of using *ts* mutants in studying genetic interactions of components of transcription complexes (51). Our study used temperature sensitive mutants of two essential Mediator subunits, Med7 and Med8, and tested for synthetic interactions in an unbiased, genome-wide manner using the yeast deletion library at the permissive temperature. This methodology generated a number of interesting observations. First, both our mutants exhibited synthetic growth defect phenotypes when combined with deletion mutants in other members of the Mediator complex. This is similar to interactions observed for Mediator deletion mutants (44). Akin to previously analyzed deletion mutants, both of our Mediator *ts* mutants also showed a strong synthetic growth phenotype with deletion mutants in *htz1* and members of the SWR-C complex. The Middle module mutant subunit, *med7 ts*, also showed a strong synthetic growth defect with deletion of TFIIS (*Δdst1*), while the Head module subunit, *med8 ts* did not. TFIIS is involved in multiple aspects of transcription including elongation. This is again consistent with the previously observed strong genetic interaction between the Mediator Middle module and Dst1. Cumulatively, these interactions and others (Figures 3 and 4) demonstrate that *ts* mutants in Mediator subunits can discover a large number of *bona fide* genetic interactions.

Since a goal of our work was to understand the how the Middle module subunits impact the properties of the entire Mediator complex, we focused on the *med7 ts* genetic interactions and found a small set of unique interactions compared to the *med8 ts*. When compared to the published E-MAP data set (44), the list of deletions that show synthetic interactions with the *med7 ts* are most similar to the Middle module query mutants [*Δmed9(cse2)*, *Δmed31(soh1)* and *Δmed1*], and also have some similarity to the deletion of subunits on the Tail/Middle module interface [*Δmed16(sin4)* and *Δmed5(nut1)*]. The synthetic growth defect observed between the *med7 ts*, and *Δhda1*, *Δhda3* and *Δhst2* were of particular interest. The Hda1 complex and Hst2, are in the histone deacetylase family of proteins and have been implicated in transcriptional silencing and repression through chromatin facilitated mechanisms (48,49). The deletion of Med16(Sin4) and Med5(Nut1), two subunits also strongly implicated in transcriptional repression via chromatin (13,32), are the only other Mediator mutants to show a synthetic growth defect with *Δhda1*. Although suggestive of a chromatin based function for Mediator, the synthetic interactions with *Δhda1*, *Δhda3* and *Δhst2* alone cannot tell us whether the Mediator mutants and the HDAC mutants are both in a pathway regulating chromatin interactions. The strong negative correlation in synthetic interactions possessed by *med7 ts* (and other core Mediator mutants) compared with those possessed by members of the Cdk8 module supports the idea that the core and Cdk8 modules of Mediator function through different repression mechanisms (19).

Invoking interactions between Mediator and chromatin, via the histone tails, raises at least two important questions given the extensive body of knowledge regarding chromatin structure and gene regulation, and Mediator's

direct role in activated transcription via RNA pol II. The first relates to the stoichiometry of nucleosomes to Mediator in the cell. In a *S. cerevisiae* cell, proteomic studies have put the number of nucleosomes at ~15-fold greater than the number of Mediator molecules. Mediator must exert its effect on chromatin via subset of nucleosomes, how and if it is targeted to specific nucleosomes is an important question. The second question relates to how Mediator can function as a both a co-activator and co-repressor. What determines whether the presence of Mediator at certain chromosomal loci leads to repression or activation? Can certain stimuli regulate the functional properties of Mediator at specific loci? Our finding that Mediator association with histone tails *in vitro*, and nucleosomes *in vivo*, is sensitive to post-translational modification of the H4 tail suggests a context to begin to address these important questions.

First, previous mass spectrometric quantification of histone modifications suggests that ~80% of nucleosomes in the genome are H4-K16Ac at any one time (52). Hence our finding that Mediator may have a preference for H4-K16-deAc nucleosomes begins to reconcile the disparity between nucleosomes and associated molecules of Mediator in the cell. However, it is almost certain that H4-K16-deAc is not the sole determinant of Mediator association with chromatin. Sir3, which is a component of silenced heterochromatin at telomeres and silenced mating type loci is also known to associate with the H4-K16-deAc histone tail (53). A competition binding experiment shows that purified Mediator and Sir3 cannot co-occupy a K16-deAc mono-nucleosome (23). Nucleosomes, such as Sir3 bound H4-K16-deAc nucleosomes, and perhaps others engaged with chromatin associated proteins or inter-nucleosome interactions (54), may be inaccessible for Mediator binding. In addition to exclusion, interactions with other histone modifications and/or DNA bound co-repressors, such as Ssn6/Tup1 (25,26), may also play a role in targeting Mediator to specific regions of chromatin. Lastly, high levels of H4 K16 acetylation of nucleosomes need not always be exclusionary of Mediator at certain genes *in vivo*, as the well characterized activator-dependent recruitment of Mediator is likely to go forward in hyper-acetylated regions of chromatin.

One of the remarkable aspects of recent Mediator genome-wide occupancy studies was the inability to see a strong positive correlation between Mediator occupancy and transcription rate (21,22). This finding is in stark contrast to other components of the general transcription machinery, such as TBP, which displays a high positive correlation between occupancy and transcriptional rate (24). Our data showing that there may be chromatin-dependent mechanisms for Mediator localization on chromatin, in addition to the activator-dependent mechanisms, provides a possible explanation for this observation. Correlation between Mediator occupancy and a hallmark of silenced chromatin, H4-K16-deAc, could explain why Mediator is associated with repressed or silenced genes in addition to activated genes.

The identification of H4-K16 acetylation as potentially playing an important role in Mediator-nucleosome

interactions helps elucidate some interesting parallels between what is already known about this histone modification and Mediator based repression. H4K16-deAc is mark that is associated with silenced heterochromatin at telomeres and silent mating type loci. Previous studies of Mediator occupancy noted enrichment of Mediator at telomeres (21–23). It is unclear how Mediator fits into the architecture of the telomere, since Sir3, another H4-K16-deAc binding protein, is a major component of telomeric heterochromatin (53). Genetic screens have identified Mediator subunits as being important for serving a barrier function between heterochromatin and euchromatin (55) at yeast mating type loci. An important class of barrier proteins identified in this study affect the acetylation state of H4-K16. Prime among these is SAS2, the histone H4-K16 acetyltransferase that functions at telomeres to help form the boundary between heterochromatin and euchromatin. Overexpression of SAS2 leads to an increase of H4-K16 acetylation and displacement of Sir3 at telomeres (56). It will be of interest to determine whether H4-K16 acetylation by SAS2 can also displace Mediator from H4-K16 deAc nucleosomes and perhaps overcome Mediator dependent repression/silencing.

In our analysis, we identified a group of 1506 genes that display a peak of Mediator binding in the promoter region (Figure 6). As demonstrated here, maximum Mediator binding at these genes corresponds to regions of low levels of H4 K16 acetylation. Furthermore, mutations that mimic H4 K8 and K16 acetylation interfere with Mediator binding to these promoters. We have further analyzed if Mediator binding correlates with TFIID and SAGA occupancy at this subset of genes, but found no significant correlations (57).

It is still unclear how the proposed H4-K16 deAc—Mediator interaction relates to the genetic interaction that we observed between the Hda1 histone deacetylase and certain Mediator mutants in the SGA screen. Hda1 does not appear to deacetylate H4-K16, but instead the absence of Hda1 *in vivo* leads to certain promoters and Hda1-affected subtelomeric (HAST) domains becoming enriched in histone H3-K18 Ac (48). In our peptide binding assays H3-K18 acetylation did not affect H3 tail—Mediator interactions (data not shown). It is intriguing that a number of genes which are derepressed by Mediator mutants, such as *FLO11* and *HO*, are located in these HAST domains and are also derepressed by *hda1* deletion. A comprehensive study of the derepression of the DNA damage response genes, *RNR3* and *HUG1*, showed that Hda1 and several different subunits of Mediator have overlapping functions when it comes to the repression of these genes (58). Mutation of both Hda1 and various Mediator subunits are required for full derepression of these genes. Hda1 almost certainly represses genes through a chromatin based mechanism. The redundancy of Hda1 and Mediator in the repression of genes could come from Mediator targeting a parallel chromatin-based and/or a non-chromatin based mechanism. Our work suggests a functional connection between core Mediator subunits and H4-K16 acetylation. The connection between Hda1, H4-K16 Ac and Mediator may also involve the variant histone Htz1. It has been shown that



H4-K16 acetylation is required for Htz1 incorporation at telomeres (59). E-MAP data also show a strong synthetic fitness defect between Hda1 and Htz1/Swr-c (44). Understanding how these genes, alone and in combination, influence chromatin structure and gene regulation at specific loci will be necessary to further elucidate this intriguing functional connection.

## SUPPLEMENTARY DATA

Supplementary Data are available at NAR Online.

## ACKNOWLEDGEMENTS

Anti-Rgr1 antibody was a gift of Dr Young-Joon Kim and the Anti-Srb5 antibody was a gift of Dr Richard Young. The SHY349 yeast strain was provided by Dr Steven Hahn. The pWZ414-F47 plasmid and the WZY42 strain were provided by Dr Sharon Y. R. Dent. The authors also thank Jay P. Uhler for preparing the K8,K16Q mutant histone H4 Flag-srb5 strain.

## FUNDING

National Institutes of Health (GM62483 to L.C.M.); Hitchcock Foundation and the Friends of Norris Cotton Cancer Center Research Fund (to L.C.M.); Fulbright Foundation (to G.B.); Åke Wiberg Foundation (to X.Z.); Swedish Research Council, the Swedish Cancer Society, and the Goran Gustafsson Foundation (to C.M.G.); Genome Canada through the Ontario Genomics Institute (2004-OGI-3-01) and the Canadian Institutes of Health Research (GSP-41567 to M.C. and C.B.); Swedish Cancer Society and the Swedish Research Councils VR and Formas (to H.R.); Swedish Science Research Council (to J.O.W.). Funding for open access charge: National Institutes of Health (GM62483 to L.C.M.).

*Conflict of interest statement.* None declared.

## REFERENCES

- Myers, L.C. and Kornberg, R.D. (2000) Mediator of transcriptional regulation. *Ann. Rev. Biochem.*, **69**, 729–749.
- Linder, T. and Gustafsson, C.M. (2004) The Sohl/MED31 protein is an ancient component of *Schizosaccharomyces pombe* and *Saccharomyces cerevisiae* Mediator. *J. Biol. Chem.*, **279**, 49455–49459.
- Guglielmi, B., van Berkum, N.L., Klapholz, B., Bijma, T., Boube, M., Boschiero, C., Bourbon, H.M., Holstege, F.C. and Werner, M. (2004) A high resolution protein interaction map of the yeast Mediator complex. *Nucleic Acids Res.*, **32**, 5379–5391.
- Bjorklund, S. and Gustafsson, C.M. (2005) The yeast Mediator complex and its regulation. *Trends Biochem. Sci.*, **30**, 240–244.
- Chadick, J.Z. and Asturias, F.J. (2005) Structure of eukaryotic Mediator complexes. *Trends Biochem. Sci.*, **30**, 264–271.
- Borggrefe, T., Davis, R., Erdjument-Bromage, H., Tempst, P. and Kornberg, R.D. (2002) A complex of the Srb8, -9, -10 and -11 transcriptional regulatory proteins from yeast. *J. Biol. Chem.*, **277**, 44202–44207.
- Samuelson, C.O., Baraznenok, V., Khorosjutina, O., Spahr, H., Kieselbach, T., Holmberg, S. and Gustafsson, C.M. (2003) TRAP230/ARC240 and TRAP240/ARC250 Mediator subunits are functionally conserved through evolution. *Proc. Natl Acad. Sci. USA*, **100**, 6422–6427.
- Bourbon, H.M. (2008) Comparative genomics supports a deep evolutionary origin for the large, four-module transcriptional mediator complex. *Nucleic Acids Res.*, **36**, 3993–4008.
- Sato, S., Tomomori-Sato, C., Parmely, T.J., Florens, L., Zybaïlov, B., Swanson, S.K., Banks, C.A., Jin, J., Cai, Y., Washburn, M.P. *et al.* (2004) A set of consensus mammalian mediator subunits identified by multidimensional protein identification technology. *Mol. Cell*, **14**, 685–691.
- Conaway, R.C., Sato, S., Tomomori-Sato, C., Yao, T. and Conaway, J.W. (2005) The mammalian Mediator complex and its role in transcriptional regulation. *Trends Biochem. Sci.*, **30**, 250–255.
- van de Peppel, J., Kettelarij, N., van Bakel, H., Kockelkorn, T.T., van Leenen, D. and Holstege, F.C. (2005) Mediator expression profiling epistasis reveals a signal transduction pathway with antagonistic submodules and highly specific downstream targets. *Mol. Cell*, **19**, 511–522.
- Holstege, F.C., Jennings, E.G., Wyrick, J.J., Lee, T.I., Hengartner, C.J., Green, M.R., Golub, T.R., Lander, E.S. and Young, R.A. (1998) Dissecting the regulatory circuitry of a eukaryotic genome. *Cell*, **95**, 717–728.
- Jiang, Y.W., Dohrmann, P.R. and Stillman, D.J. (1995) Genetic and physical interactions between yeast RGR1 and SIN4 in chromatin organization and transcriptional regulation. *Genetics*, **140**, 47–54.
- Song, W., Treich, I., Qian, N., Kuchin, S. and Carlson, M. (1996) SSN genes that affect transcriptional repression in *Saccharomyces cerevisiae* encode SIN4, ROX3, and SRB proteins associated with RNA polymerase II. *Mol. Cell Biol.*, **16**, 115–120.
- Yu, Y., Eriksson, P. and Stillman, D.J. (2000) Architectural transcription factors and the SAGA complex function in parallel pathways to activate transcription. *Mol. Cell Biol.*, **20**, 2350–2357.
- Howard, S.C., Chang, Y.W., Budovskaya, Y.V. and Herman, P.K. (2001) The Ras/PKA signaling pathway of *Saccharomyces cerevisiae* exhibits a functional interaction with the Sin4p complex of the RNA polymerase II holoenzyme. *Genetics*, **159**, 77–89.
- Wang, X. and Michels, C.A. (2004) Mutations in SIN4 and RGR1 cause constitutive expression of MAL structural genes in *Saccharomyces cerevisiae*. *Genetics*, **168**, 747–757.
- Li, L., Quinton, T., Miles, S. and Breeden, L.L. (2005) Genetic interactions between mediator and the late G1-specific transcription factor Swi6 in *Saccharomyces cerevisiae*. *Genetics*, **171**, 477–488.
- Singh, H., Erkin, A.M., Kremer, S.B., Duttweiler, H.M., Davis, D.A., Iqbal, J., Gross, R.R. and Gross, D.S. (2006) A functional module of yeast mediator that governs the dynamic range of heat-shock gene expression. *Genetics*, **172**, 2169–2184.
- Fan, X., Chou, D.M. and Struhl, K. (2006) Activator-specific recruitment of Mediator in vivo. *Nat. Struct. Mol. Biol.*, **13**, 117–120.
- Andrau, J.C., van de Pasch, L., Lijnzaad, P., Bijma, T., Koerkamp, M.G., van de Peppel, J., Werner, M. and Holstege, F.C. (2006) Genome-wide location of the coactivator mediator: Binding without activation and transient Cdk8 interaction on DNA. *Mol. Cell*, **22**, 179–192.
- Zhu, X., Wren, M., Sinha, I., Rasmussen, N.N., Linder, T., Holmberg, S., Ekwall, K. and Gustafsson, C.M. (2006) Genome-wide occupancy profile of mediator and the Srb8-11 module reveals interactions with coding regions. *Mol. Cell*, **22**, 169–178.
- Zhu, X., Liu, B., Carlsten, J.O., Beve, J., Nyström, T., Myers, L.C. and Gustafsson, C.M. (2011) Mediator influences telomeric silencing and cellular lifespan. *Mol. Cell Biol.*, **12**, 2413–2421.
- Kim, J. and Iyer, V.R. (2004) Global role of TATA box-binding protein recruitment to promoters in mediating gene expression profiles. *Mol. Cell Biol.*, **24**, 8104–8112.
- Gromollner, A. and Lehming, N. (2000) Srb7p is a physical and physiological target of Tup1p. *EMBO J.*, **19**, 6845–6852.
- Han, S.J., Lee, J.S., Kang, J.S. and Kim, Y.J. (2001) Med9/Cse2 and Gall1 modules are required for transcriptional repression of distinct group of genes. *J. Biol. Chem.*, **276**, 37020–37026.

27. Taverna, S.D., Li, H., Ruthenburg, A.J., Allis, C.D. and Patel, D.J. (2007) How chromatin-binding modules interpret histone modifications: lessons from professional pocket pickers. *Nat. Struct. Mol. Biol.*, **14**, 1025–1040.
28. Lorch, Y., Beve, J., Gustafsson, C.M., Myers, L.C. and Kornberg, R.D. (2000) Mediator–Nucleosome Interaction. *Mol. Cell*, **6**, 197–201.
29. Malave, T.M. and Dent, S.Y. (2006) Transcriptional repression by Tup1–Ssn6. *Biochem. Cell. Biol.*, **84**, 437–443.
30. Uffenbeck, S.R. and Krebs, J.E. (2006) The role of chromatin structure in regulating stress-induced transcription in *Saccharomyces cerevisiae*. *Biochem. Cell. Biol.*, **84**, 477–489.
31. Gao, L. and Gross, D.S. (2006) Using genomics and proteomics to investigate mechanisms of transcriptional silencing in *Saccharomyces cerevisiae*. *Brief Funct. Genomic Proteomic.*, **5**, 280–288.
32. Macatee, T., Jiang, Y.W., Stillman, D.J. and Roth, S.Y. (1997) Global alterations in chromatin accessibility associated with loss of SIN4 function. *Nucleic Acids Res.*, **25**, 1240–1247.
33. Jiang, Y.W. and Stillman, D.J. (1996) Epigenetic effects on yeast transcription caused by mutations in an actin-related protein present in the nucleus. *Genes Dev.*, **10**, 604–619.
34. Muhlrud, D., Hunter, R. and Parker, R. (1992) A rapid method for localized mutagenesis of yeast genes. *Yeast*, **8**, 79–82.
35. Leung, D.W., Chen, E. and Goeddel, D.V. (1989) A method for random mutagenesis of a defined DNA segment using a modified polymerase chain reaction. *Technique*, **1**, 11–15.
36. Brachmann, C.B., Davies, A., Cost, G.J., Caputo, E., Li, J., Hieter, P. and Boeke, J.D. (1998) Designer deletion strains derived from *Saccharomyces cerevisiae* S288C: a useful set of strains and plasmids for PCR-mediated gene disruption and other applications. *Yeast*, **14**, 115–132.
37. Rani, P.G., Ranish, J.A. and Hahn, S. (2004) RNA polymerase II (Pol II)-TFIIF and Pol II-mediator complexes: the major stable Pol II complexes and their activity in transcription initiation and reinitiation. *Mol. Cell. Biol.*, **24**, 1709–1720.
38. Tong, A.H. and Boone, C. (2006) Synthetic genetic array analysis in *Saccharomyces cerevisiae*. *Methods Mol. Biol.*, **313**, 171–192.
39. Zhang, W., Bone, J.R., Edmondson, D.G., Turner, B.M. and Roth, S.Y. (1998) Essential and redundant functions of histone acetylation revealed by mutation of target lysines and loss of the Gen5p acetyltransferase. *EMBO J.*, **17**, 3155–3167.
40. Myers, L.C., Leuther, K., Bushnell, D.A., Gustafsson, C.M. and Kornberg, R.D. (1997) Yeast RNA polymerase II transcription reconstituted with purified proteins. *Methods Comp. Meth. Enzymol.*, **12**, 212–216.
41. Takagi, Y., Chadick, J.Z., Davis, J.A. and Asturias, F.J. (2005) Preponderance of free mediator in the yeast *Saccharomyces cerevisiae*. *J. Biol. Chem.*, **280**, 31200–31207.
42. Baidoo, S.M., Guidi, B.W. and Myers, L.C. (2007) Med19(Rox3) regulates inter-module interactions in the *S. cerevisiae* Mediator complex. *J. Biol. Chem.*, **282**, 5551–5559.
43. Tong, A.H., Lesage, G., Bader, G.D., Ding, H., Xu, H., Xin, X., Young, J., Berriz, G.F., Brost, R.L., Chang, M. *et al.* (2004) Global mapping of the yeast genetic interaction network. *Science*, **303**, 808–813.
44. Collins, S.R., Miller, K.M., Maas, N.L., Roguev, A., Fillingham, J., Chu, C.S., Schuldiner, M., Gebbia, M., Recht, J., Shales, M. *et al.* (2007) Functional dissection of protein complexes involved in yeast chromosome biology using a genetic interaction map. *Nature*, **446**, 806–810.
45. Costanzo, M., Baryshnikova, A., Bellay, J., Kim, Y., Spear, E.D., Sevier, C.S., Ding, H., Koh, J.L., Toufighi, K., Mostafavi, S. *et al.* (2010) The genetic landscape of a cell. *Science*, **327**, 425–431.
46. Zhu, X. and Gustafsson, C.M. (2009) Distinct differences in chromatin structure at subtelomeric X and Y’ elements in budding yeast. *PLoS One*, **4**, e6363.
47. Larivière, L., Seizl, M., van Wageningen, S., Röther, S., van de Pasch, L., Feldmann, H., Strässer, K., Hahn, S., Holstege, F.C. and Cramer, P. (2008) Structure-system correlation identifies a gene regulatory Mediator submodule. *Genes Dev.*, **22**, 872–877.
48. Robyr, D., Suka, Y., Xenarios, I., Kurdiani, S.K., Wang, A., Suka, N. and Grunstein, M. (2002) Microarray deacetylation maps determine genome-wide functions for yeast histone deacetylases. *Cell*, **109**, 437–446.
49. Perrod, S., Cockell, M.M., Laroche, T., Renaud, H., Ducrest, A.L., Bonnard, C. and Gasser, S.M. (2001) A cytosolic NAD-dependent deacetylase, Hst2p, can modulate nucleolar and telomeric silencing in yeast. *EMBO J.*, **20**, 197–209.
50. Rando, O.J. and Chang, H.Y. (2009) Genome-wide views of chromatin structure. *Annu. Rev. Biochem.*, **78**, 245–271.
51. Milgrom, E., West, R.W. Jr, Gao, C. and Shen, W.C. (2005) TFIID and Spt-Ada-Gcn5-acetyltransferase functions probed by genome-wide synthetic genetic array analysis using a *Saccharomyces cerevisiae* taf9-ts allele. *Genetics*, **171**, 959–973.
52. Smith, C.M., Gafken, P.R., Zhang, Z., Gottschling, D.E., Smith, J.B. and Smith, D.L. (2003) Mass spectrometric quantification of acetylation at specific lysines within the amino-terminal tail of histone H4. *Anal. Biochem.*, **316**, 23–33.
53. Onishi, M., Liou, G.G., Buchberger, J.R., Walz, T. and Moazed, D. (2007) Role of the conserved Sir3-BAH domain in nucleosome binding and silent chromatin assembly. *Mol. Cell*, **28**, 1015–1028.
54. Shogren-Knaak, M., Ishii, H., Sun, J.M., Pazin, M.J., Davie, J.R. and Peterson, C.L. (2006) Histone H4-K16 acetylation controls chromatin structure and protein interactions. *Science*, **311**, 844–847.
55. Oki, M., Valenzuela, L., Chiba, T., Ito, T. and Kamakaka, R.T. (2004) Barrier proteins remodel and modify chromatin to restrict silenced domains. *Mol. Cell. Biol.*, **24**, 1956–1967.
56. Altaf, M., Utley, R.T., Lacoste, N., Tan, S., Briggs, S.D. and Côté, J. (2007) Interplay of chromatin modifiers on a short basic patch of histone H4 tail defines the boundary of telomeric heterochromatin. *Mol. Cell*, **28**, 1002–1014.
57. Venters, B.J., Wachi, S., Mavrich, T.N., Andersen, B.E., Jena, P., Sinnamon, A.J., Jain, P., Roller, N.S., Jiang, C., Hemeryck-Walsh, C. *et al.* (2011) A comprehensive genomic binding map of gene and chromatin regulatory proteins in *Saccharomyces*. *Mol. Cell*, **41**, 480–492.
58. Zhang, Z. and Reese, J.C. (2004) Redundant mechanisms are used by Ssn6-Tup1 in repressing chromosomal gene transcription in *Saccharomyces cerevisiae*. *J. Biol. Chem.*, **279**, 39240–39250.
59. Shia, W.J., Li, B. and Workman, J.L. (2006) SAS-mediated acetylation of histone H4 Lys 16 is required for H2A.Z incorporation at subtelomeric regions in *Saccharomyces cerevisiae*. *Genes Dev.*, **20**, 2507–2512.
